# Supplementary material for: Prescription Trends in Complex Regional Pain Syndrome: A Retrospective Case–Control Study
Source: MDPI journal article supplement (doi:10.3390/brainsci13071012), 2023-06-30

# Supplemental Data

**Table S1.** Differences between general prescription rates of specific medications amongst CRPS cases and controls.

| Characteristic                 | CRPS, N =<br>2,510 <sup>1</sup> | Control, N =<br>2,510 <sup>1</sup> | Difference <sup>2</sup> | 95% CI <sup>23</sup> | p-value <sup>2</sup> | q-value <sup>4</sup> |
|--------------------------------|---------------------------------|------------------------------------|-------------------------|----------------------|----------------------|----------------------|
| <b>Medication</b>              |                                 |                                    |                         |                      |                      |                      |
| None                           | 299 (12%)                       | 0 (0%)                             | 0.1191235060            | 0.11, 0.13           | <0.001               | <0.001               |
| Alendronate-Cholecalciferol    | 0 (0%)                          | 1 (<0.1%)                          | -0.0003984064           | 0.00, 0.00           | >0.9                 | >0.9                 |
| Alendronate Sodium             | 83 (3.3%)                       | 75 (3.0%)                          | 0.0031872510            | -0.01, 0.01          | 0.6                  | 0.8                  |
| Alprazolam                     | 205 (8.2%)                      | 159 (6.3%)                         | 0.0183266932            | 0.00, 0.03           | 0.014                | 0.033                |
| Amitriptyline HCl              | 633 (25%)                       | 219 (8.7%)                         | 0.1649402390            | 0.14, 0.19           | <0.001               | <0.001               |
| Buprenorphine                  | 25 (1.0%)                       | 11 (0.4%)                          | 0.0055776892            | 0.00, 0.01           | 0.030                | 0.067                |
| Buprenorphine HCl              | 12 (0.5%)                       | 6 (0.2%)                           | 0.0023904382            | 0.00, 0.01           | 0.2                  | 0.4                  |
| Buprenorphine HCl-Naloxone HCl | 39 (1.6%)                       | 31 (1.2%)                          | 0.0031872510            | 0.00, 0.01           | 0.4                  | 0.6                  |
| Calcitonin (Salmon)            | 5 (0.2%)                        | 3 (0.1%)                           | 0.0007968127            | 0.00, 0.00           | 0.7                  | >0.9                 |
| Capsaicin                      | 154 (6.1%)                      | 52 (2.1%)                          | 0.0406374502            | 0.03, 0.05           | <0.001               | <0.001               |
| Celecoxib                      | 229 (9.1%)                      | 101 (4.0%)                         | 0.0509960159            | 0.04, 0.07           | <0.001               | <0.001               |
| Chlordiazepoxide               | 0 (0%)                          | 1 (<0.1%)                          | -0.0003984064           | 0.00, 0.00           | >0.9                 | >0.9                 |
| Chlordiazepoxide HCl           | 5 (0.2%)                        | 3 (0.1%)                           | 0.0007968127            | 0.00, 0.00           | 0.7                  | >0.9                 |
| Clorazepate Dipotassium        | 1 (<0.1%)                       | 1 (<0.1%)                          | 0.0000000000            | 0.00, 0.00           | >0.9                 | >0.9                 |
| Codeine Sulfate                | 8 (0.3%)                        | 2 (<0.1%)                          | 0.0023904382            | 0.00, 0.01           | 0.11                 | 0.2                  |
| Cyclobenzaprine-Gabapentin     | 0 (0%)                          | 1 (<0.1%)                          | -0.0003984064           | 0.00, 0.00           | >0.9                 | >0.9                 |
| Desipramine HCl                | 13 (0.5%)                       | 4 (0.2%)                           | 0.0035856574            | 0.00, 0.01           | 0.052                | 0.10                 |
| Dexamethasone                  | 50 (2.0%)                       | 31 (1.2%)                          | 0.0075697211            | 0.00, 0.01           | 0.044                | 0.090                |
| Dextromethorphan-guaifenesin   | 189 (7.5%)                      | 137 (5.5%)                         | 0.0207171315            | 0.01, 0.03           | 0.003                | 0.009                |
| Dextromethorphan-quinidine     | 3 (0.1%)                        | 4 (0.2%)                           | -0.0003984064           | 0.00, 0.00           | >0.9                 | >0.9                 |
| Dextromethorphan HBr           | 4 (0.2%)                        | 2 (<0.1%)                          | 0.0007968127            | 0.00, 0.00           | 0.7                  | >0.9                 |
| Diazepam                       | 282 (11%)                       | 124 (4.9%)                         | 0.0629482072            | 0.05, 0.08           | <0.001               | <0.001               |
| Diclofenac                     | 1 (<0.1%)                       | 3 (0.1%)                           | -0.0007968127           | 0.00, 0.00           | 0.6                  | 0.8                  |
| Diclofenac-misoprostol         | 29 (1.2%)                       | 11 (0.4%)                          | 0.0071713147            | 0.00, 0.01           | 0.007                | 0.017                |
| Diclofenac Potassium           | 47 (1.9%)                       | 20 (0.8%)                          | 0.0107569721            | 0.00, 0.02           | 0.001                | 0.004                |
| Diclofenac Sodium              | 546 (22%)                       | 378 (15%)                          | 0.0669322709            | 0.05, 0.09           | <0.001               | <0.001               |
| Duloxetine HCl                 | 567 (23%)                       | 204 (8.1%)                         | 0.1446215139            | 0.12, 0.16           | <0.001               | <0.001               |
| Etidronate Disodium            | 1 (<0.1%)                       | 0 (0%)                             | 0.0003984064            | 0.00, 0.00           | >0.9                 | >0.9                 |
| Etodolac                       | 103 (4.1%)                      | 61 (2.4%)                          | 0.0167330677            | 0.01, 0.03           | 0.001                | 0.003                |
| Fenoprofen Calcium             | 1 (<0.1%)                       | 0 (0%)                             | 0.0003984064            | 0.00, 0.00           | >0.9                 | >0.9                 |
| Fentanyl patch                 | 73 (2.9%)                       | 17 (0.7%)                          | 0.0223107570            | 0.01, 0.03           | <0.001               | <0.001               |
| Flurbiprofen                   | 3 (0.1%)                        | 2 (<0.1%)                          | 0.0003984064            | 0.00, 0.00           | >0.9                 | >0.9                 |
| Gabapentin                     | 1,469 (59%)                     | 674 (27%)                          | 0.3167330677            | 0.29, 0.34           | <0.001               | <0.001               |
| Gabapentin & Diet Manage Prod  | 1 (<0.1%)                       | 0 (0%)                             | 0.0003984064            | 0.00, 0.00           | >0.9                 | >0.9                 |
| Gabapentin (Once-Daily)        | 24 (1.0%)                       | 4 (0.2%)                           | 0.0079681275            | 0.00, 0.01           | <0.001               | 0.001                |
| Gabapentin Enacarbil           | 2 (<0.1%)                       | 0 (0%)                             | 0.0007968127            | 0.00, 0.00           | 0.5                  | 0.7                  |
| Hydrocodone-Acetaminophen      | 790 (31%)                       | 457 (18%)                          | 0.1326693227            | 0.11, 0.16           | <0.001               | <0.001               |
| Hydrocodone-Chlorpheniramine   | 1 (<0.1%)                       | 0 (0%)                             | 0.0003984064            | 0.00, 0.00           | >0.9                 | >0.9                 |
| Hydrocodone-guaifenesin        | 2 (<0.1%)                       | 0 (0%)                             | 0.0007968127            | 0.00, 0.00           | 0.5                  | 0.7                  |
| Hydrocodone-Homatropine        | 60 (2.4%)                       | 50 (2.0%)                          | 0.0039840637            | 0.00, 0.01           | 0.4                  | 0.6                  |

| Characteristic                      | CRPS, N =<br>2,510 <sup>1</sup> | Control, N =<br>2,510 <sup>1</sup> | Difference <sup>2</sup> | 95% CI <sup>23</sup> | p-value <sup>2</sup> | q-value <sup>4</sup> |
|-------------------------------------|---------------------------------|------------------------------------|-------------------------|----------------------|----------------------|----------------------|
| Hydrocodone-Ibuprofen               | 20 (0.8%)                       | 10 (0.4%)                          | 0.0039840637            | 0.00, 0.01           | 0.10                 | 0.2                  |
| Hydrocodone Bitartrate              | 5 (0.2%)                        | 1 (<0.1%)                          | 0.0015936255            | 0.00, 0.00           | 0.2                  | 0.4                  |
| Hydromorphone HCl                   | 77 (3.1%)                       | 18 (0.7%)                          | 0.0235059761            | 0.02, 0.03           | <0.001               | <0.001               |
| Ibandronate Sodium                  | 15 (0.6%)                       | 12 (0.5%)                          | 0.0011952191            | 0.00, 0.01           | 0.7                  | >0.9                 |
| Ibuprofen                           | 1,041 (41%)                     | 1,072 (43%)                        | -0.0123505976           | -0.04, 0.02          | 0.4                  | 0.6                  |
| Ibuprofen-Famotidine                | 3 (0.1%)                        | 2 (<0.1%)                          | 0.0003984064            | 0.00, 0.00           | >0.9                 | >0.9                 |
| Indomethacin                        | 78 (3.1%)                       | 63 (2.5%)                          | 0.0059760956            | 0.00, 0.02           | 0.2                  | 0.4                  |
| Ketoprofen                          | 4 (0.2%)                        | 1 (<0.1%)                          | 0.0011952191            | 0.00, 0.00           | 0.4                  | 0.6                  |
| Ketorolac Tromethamine              | 135 (5.4%)                      | 58 (2.3%)                          | 0.0306772908            | 0.02, 0.04           | <0.001               | <0.001               |
| Lorazepam                           | 437 (17%)                       | 201 (8.0%)                         | 0.0940239044            | 0.08, 0.11           | <0.001               | <0.001               |
| Meclofenamate Sodium                | 3 (0.1%)                        | 1 (<0.1%)                          | 0.0007968127            | 0.00, 0.00           | 0.6                  | 0.8                  |
| Mefenamic Acid                      | 3 (0.1%)                        | 2 (<0.1%)                          | 0.0003984064            | 0.00, 0.00           | >0.9                 | >0.9                 |
| Meloxicam                           | 659 (26%)                       | 473 (19%)                          | 0.0741035857            | 0.05, 0.10           | <0.001               | <0.001               |
| Meperidine HCl                      | 12 (0.5%)                       | 1 (<0.1%)                          | 0.0043824701            | 0.00, 0.01           | 0.005                | 0.014                |
| Methadone                           | 6 (0.2%)                        | 0 (0%)                             | 0.0023904382            | 0.00, 0.00           | 0.041                | 0.086                |
| Methadone HCl                       | 195 (7.8%)                      | 22 (0.9%)                          | 0.0689243028            | 0.06, 0.08           | <0.001               | <0.001               |
| Methylprednisolone                  | 389 (15%)                       | 256 (10%)                          | 0.0529880478            | 0.03, 0.07           | <0.001               | <0.001               |
| Methylprednisolone Acetate          | 27 (1.1%)                       | 6 (0.2%)                           | 0.0083665339            | 0.00, 0.01           | <0.001               | 0.002                |
| Methylprednisolone Sodium Succinate | 5 (0.2%)                        | 4 (0.2%)                           | 0.0003984064            | 0.00, 0.00           | >0.9                 | >0.9                 |
| Morphine Sulfate                    | 220 (8.8%)                      | 31 (1.2%)                          | 0.0752988048            | 0.06, 0.09           | <0.001               | <0.001               |
| Nabumetone                          | 115 (4.6%)                      | 65 (2.6%)                          | 0.0199203187            | 0.01, 0.03           | <0.001               | <0.001               |
| Naproxen                            | 767 (31%)                       | 719 (29%)                          | 0.0191235060            | -0.01, 0.04          | 0.15                 | 0.3                  |
| Naproxen-Esomeprazole               | 1 (<0.1%)                       | 1 (<0.1%)                          | 0.0000000000            | 0.00, 0.00           | >0.9                 | >0.9                 |
| Naproxen Sodium                     | 92 (3.7%)                       | 56 (2.2%)                          | 0.0143426295            | 0.00, 0.02           | 0.003                | 0.009                |
| Naproxen Sodium-Gabapentin          | 1 (<0.1%)                       | 0 (0%)                             | 0.0003984064            | 0.00, 0.00           | >0.9                 | >0.9                 |
| Nortriptyline HCl                   | 206 (8.2%)                      | 67 (2.7%)                          | 0.0553784861            | 0.04, 0.07           | <0.001               | <0.001               |
| Oxaprozin                           | 17 (0.7%)                       | 6 (0.2%)                           | 0.0043824701            | 0.00, 0.01           | 0.037                | 0.081                |
| Oxazepam                            | 1 (<0.1%)                       | 0 (0%)                             | 0.0003984064            | 0.00, 0.00           | >0.9                 | >0.9                 |
| Oxycodone                           | 6 (0.2%)                        | 0 (0%)                             | 0.0023904382            | 0.00, 0.00           | 0.041                | 0.086                |
| Oxycodone-Acetaminophen             | 1,128 (45%)                     | 583 (23%)                          | 0.2171314741            | 0.19, 0.24           | <0.001               | <0.001               |
| Oxycodone HCl                       | 553 (22%)                       | 183 (7.3%)                         | 0.1474103586            | 0.13, 0.17           | <0.001               | <0.001               |
| Oxymorphone HCl                     | 23 (0.9%)                       | 4 (0.2%)                           | 0.0075697211            | 0.00, 0.01           | <0.001               | 0.002                |
| Piroxicam                           | 7 (0.3%)                        | 9 (0.4%)                           | -0.0007968127           | 0.00, 0.00           | 0.8                  | >0.9                 |
| Prednisolone                        | 4 (0.2%)                        | 1 (<0.1%)                          | 0.0011952191            | 0.00, 0.00           | 0.4                  | 0.6                  |
| Prednisolone Acetate                | 78 (3.1%)                       | 83 (3.3%)                          | -0.0019920319           | -0.01, 0.01          | 0.7                  | >0.9                 |
| Prednisolone Sodium Phosphate       | 5 (0.2%)                        | 4 (0.2%)                           | 0.0003984064            | 0.00, 0.00           | >0.9                 | >0.9                 |
| Prednisone                          | 928 (37%)                       | 616 (25%)                          | 0.1243027888            | 0.10, 0.15           | <0.001               | <0.001               |
| Pregabalin                          | 738 (29%)                       | 142 (5.7%)                         | 0.2374501992            | 0.22, 0.26           | <0.001               | <0.001               |
| Risedronate Sodium                  | 14 (0.6%)                       | 7 (0.3%)                           | 0.0027888446            | 0.00, 0.01           | 0.2                  | 0.3                  |
| Rofecoxib                           | 0 (0%)                          | 5 (0.2%)                           | -0.0019920319           | 0.00, 0.00           | 0.073                | 0.14                 |
| Sulindac                            | 21 (0.8%)                       | 7 (0.3%)                           | 0.0055776892            | 0.00, 0.01           | 0.014                | 0.033                |
| Tapentadol HCl                      | 42 (1.7%)                       | 3 (0.1%)                           | 0.0155378486            | 0.01, 0.02           | <0.001               | <0.001               |
| Tetracycline HCl                    | 1 (<0.1%)                       | 3 (0.1%)                           | -0.0007968127           | 0.00, 0.00           | 0.6                  | 0.8                  |
| Topiramate                          | 427 (17%)                       | 163 (6.5%)                         | 0.1051792829            | 0.09, 0.12           | <0.001               | <0.001               |

| Characteristic         | CRPS, N =<br>2,510 <sup>1</sup> | Control, N =<br>2,510 <sup>1</sup> | Difference <sup>2</sup> | 95% CI <sup>23</sup> | p-value <sup>2</sup> | q-value <sup>4</sup> |
|------------------------|---------------------------------|------------------------------------|-------------------------|----------------------|----------------------|----------------------|
| Tramadol-Acetaminophen | 20 (0.8%)                       | 5 (0.2%)                           | 0.0059760956            | 0.00, 0.01           | 0.005                | 0.013                |
| Tramadol HCl           | 822 (33%)                       | 394 (16%)                          | 0.1705179283            | 0.15, 0.19           | <0.001               | <0.001               |
| Valdecoxib             | 0 (0%)                          | 2 (<0.1%)                          | -0.0007968127           | 0.00, 0.00           | 0.5                  | 0.7                  |
| Zoledronic Acid        | 2 (<0.1%)                       | 5 (0.2%)                           | -0.0011952191           | 0.00, 0.00           | 0.4                  | 0.7                  |

<sup>1</sup>n (%); <sup>2</sup>Two sample test for equality of proportions; 2-sample test for equality of proportions without continuity correction; <sup>3</sup>CI = Confidence Interval; <sup>4</sup>False discovery rate correction for multiple testing.

**Table S2.** CRPS-associated prescriptions of specific medications amongst CRPS cases compared with matched controls.

| Characteristic                 | CRPS, N = 670 <sup>1</sup> | Other, N = 670 <sup>1</sup> | Difference <sup>2</sup> | 95% CI <sup>23</sup> | p-value <sup>2</sup> | q-value <sup>4</sup> |
|--------------------------------|----------------------------|-----------------------------|-------------------------|----------------------|----------------------|----------------------|
| <b>Medication</b>              |                            |                             |                         |                      |                      |                      |
| Alendronate Sodium             | 1 (0.1%)                   | 19 (2.8%)                   | -0.026865672            | -0.04, -0.01         | <0.001               | <0.001               |
| Alprazolam                     | 11 (1.6%)                  | 33 (4.9%)                   | -0.032835821            | -0.05, -0.01         | 0.001                | 0.005                |
| Amitriptyline HCl              | 85 (13%)                   | 53 (7.9%)                   | 0.047761194             | 0.01, 0.08           | 0.005                | 0.019                |
| Buprenorphine                  | 8 (1.2%)                   | 5 (0.7%)                    | 0.004477612             | -0.01, 0.02          | 0.6                  | 0.9                  |
| Buprenorphine HCl              | 3 (0.4%)                   | 1 (0.1%)                    | 0.002985075             | 0.00, 0.01           | 0.6                  | 0.9                  |
| Buprenorphine HCl-Naloxone HCl | 1 (0.1%)                   | 7 (1.0%)                    | -0.008955224            | -0.02, 0.00          | 0.076                | 0.2                  |
| Calcitonin                     | 1 (0.1%)                   | 0 (0%)                      | 0.001492537             | 0.00, 0.01           | >0.9                 | >0.9                 |
| Capsaicin                      | 7 (1.0%)                   | 19 (2.8%)                   | -0.017910448            | -0.03, 0.00          | 0.029                | 0.084                |
| Celecoxib                      | 19 (2.8%)                  | 24 (3.6%)                   | -0.007462687            | -0.03, 0.01          | 0.5                  | 0.8                  |
| Chlordiazepoxide HCl           | 0 (0%)                     | 2 (0.3%)                    | -0.002985075            | -0.01, 0.00          | 0.5                  | 0.8                  |
| Desipramine HCl                | 2 (0.3%)                   | 0 (0%)                      | 0.002985075             | 0.00, 0.01           | 0.5                  | 0.8                  |
| Dexamethasone                  | 0 (0%)                     | 9 (1.3%)                    | -0.013432836            | -0.02, 0.00          | 0.007                | 0.026                |
| Dextromethorphan-guaifenesin   | 0 (0%)                     | 45 (6.7%)                   | -0.067164179            | -0.09, -0.05         | <0.001               | <0.001               |
| Dextromethorphan-quinidine     | 0 (0%)                     | 1 (0.1%)                    | -0.001492537            | -0.01, 0.00          | >0.9                 | >0.9                 |
| Diazepam                       | 18 (2.7%)                  | 35 (5.2%)                   | -0.025373134            | -0.05, 0.00          | 0.025                | 0.078                |
| Diclofenac                     | 0 (0%)                     | 2 (0.3%)                    | -0.002985075            | -0.01, 0.00          | 0.5                  | 0.8                  |
| Diclofenac-misoprostol         | 2 (0.3%)                   | 6 (0.9%)                    | -0.005970149            | -0.02, 0.00          | 0.3                  | 0.6                  |
| Diclofenac Potassium           | 5 (0.7%)                   | 10 (1.5%)                   | -0.007462687            | -0.02, 0.01          | 0.3                  | 0.6                  |
| Diclofenac Sodium              | 15 (2.2%)                  | 104 (16%)                   | -0.132835821            | -0.16, -0.10         | <0.001               | <0.001               |
| Duloxetine HCl                 | 58 (8.7%)                  | 54 (8.1%)                   | 0.005970149             | -0.03, 0.04          | 0.8                  | >0.9                 |
| Etodolac                       | 6 (0.9%)                   | 20 (3.0%)                   | -0.020895522            | -0.04, 0.00          | 0.010                | 0.033                |
| Fentanyl patch                 | 9 (1.3%)                   | 1 (0.1%)                    | 0.011940299             | 0.00, 0.02           | 0.026                | 0.079                |
| Flurbiprofen                   | 1 (0.1%)                   | 0 (0%)                      | 0.001492537             | 0.00, 0.01           | >0.9                 | >0.9                 |
| Gabapentin                     | 237 (35%)                  | 181 (27%)                   | 0.083582090             | 0.03, 0.13           | 0.001                | 0.005                |
| Gabapentin (Once-Daily)        | 2 (0.3%)                   | 1 (0.1%)                    | 0.001492537             | -0.01, 0.01          | >0.9                 | >0.9                 |
| Hydrocodone-Acetaminophen      | 69 (10%)                   | 121 (18%)                   | -0.077611940            | -0.12, -0.04         | <0.001               | <0.001               |
| HYDROcodone-Homatropine        | 0 (0%)                     | 11 (1.6%)                   | -0.016417910            | -0.03, -0.01         | 0.002                | 0.009                |
| Hydrocodone -Ibuprofen         | 2 (0.3%)                   | 2 (0.3%)                    | 0.000000000             | -0.01, 0.01          | >0.9                 | >0.9                 |
| Hydrocodone Bitartrate         | 1 (0.1%)                   | 0 (0%)                      | 0.001492537             | 0.00, 0.01           | >0.9                 | >0.9                 |
| Hydromorphone HCl              | 12 (1.8%)                  | 8 (1.2%)                    | 0.005970149             | -0.01, 0.02          | 0.5                  | 0.8                  |
| Ibandronate Sodium             | 0 (0%)                     | 2 (0.3%)                    | -0.002985075            | -0.01, 0.00          | 0.5                  | 0.8                  |

| Characteristic                 | CRPS, N = 670 <sup>1</sup> | Other, N = 670 <sup>1</sup> | Difference <sup>2</sup> | 95% CI <sup>2,3</sup> | p-value <sup>2</sup> | q-value <sup>4</sup> |
|--------------------------------|----------------------------|-----------------------------|-------------------------|-----------------------|----------------------|----------------------|
| Ibuprofen                      | 32 (4.8%)                  | 294 (44%)                   | -0.391044776            | -0.43, -0.35          | <0.001               | <0.001               |
| Ibuprofen-Famotidine           | 0 (0%)                     | 1 (0.1%)                    | -0.001492537            | -0.01, 0.00           | >0.9                 | >0.9                 |
| Indomethacin                   | 1 (0.1%)                   | 17 (2.5%)                   | -0.023880597            | -0.04, -0.01          | <0.001               | 0.002                |
| Ketorolac Tromethamine         | 2 (0.3%)                   | 9 (1.3%)                    | -0.010447761            | -0.02, 0.00           | 0.069                | 0.2                  |
| Lorazepam                      | 76 (11%)                   | 57 (8.5%)                   | 0.028358209             | -0.01, 0.06           | 0.10                 | 0.2                  |
| Mefenamic Acid                 | 0 (0%)                     | 1 (0.1%)                    | -0.001492537            | -0.01, 0.00           | >0.9                 | >0.9                 |
| Meloxicam                      | 34 (5.1%)                  | 134 (20%)                   | -0.149253731            | -0.19, -0.11          | <0.001               | <0.001               |
| Meperidine HCl                 | 2 (0.3%)                   | 0 (0%)                      | 0.002985075             | 0.00, 0.01            | 0.5                  | 0.8                  |
| Methadone HCl                  | 63 (9.4%)                  | 3 (0.4%)                    | 0.089552239             | 0.07, 0.11            | <0.001               | <0.001               |
| Methylprednisolone             | 11 (1.6%)                  | 62 (9.3%)                   | -0.076119403            | -0.10, -0.05          | <0.001               | <0.001               |
| Methylprednisolone Acetate     | 12 (1.8%)                  | 3 (0.4%)                    | 0.013432836             | 0.00, 0.03            | 0.038                | 0.10                 |
| Methylprednisolone Sodium Succ | 0 (0%)                     | 1 (0.1%)                    | -0.001492537            | -0.01, 0.00           | >0.9                 | >0.9                 |
| Morphine Sulfate               | 51 (7.6%)                  | 9 (1.3%)                    | 0.062686567             | 0.04, 0.09            | <0.001               | <0.001               |
| Nabumetone                     | 7 (1.0%)                   | 16 (2.4%)                   | -0.013432836            | -0.03, 0.00           | 0.092                | 0.2                  |
| Naproxen                       | 23 (3.4%)                  | 188 (28%)                   | -0.246268657            | -0.28, -0.21          | <0.001               | <0.001               |
| Naproxen Sodium                | 0 (0%)                     | 19 (2.8%)                   | -0.028358209            | -0.04, -0.01          | <0.001               | <0.001               |
| Nortriptyline HCl              | 17 (2.5%)                  | 20 (3.0%)                   | -0.004477612            | -0.02, 0.01           | 0.7                  | >0.9                 |
| Oxaprozin                      | 1 (0.1%)                   | 1 (0.1%)                    | 0.000000000             | 0.00, 0.00            | >0.9                 | >0.9                 |
| Oxycodone                      | 2 (0.3%)                   | 0 (0%)                      | 0.002985075             | 0.00, 0.01            | 0.5                  | 0.8                  |
| Oxycodone-Acetaminophen        | 170 (25%)                  | 169 (25%)                   | 0.001492537             | -0.05, 0.05           | >0.9                 | >0.9                 |
| Oxycodone HCl                  | 82 (12%)                   | 60 (9.0%)                   | 0.032835821             | 0.00, 0.07            | 0.062                | 0.2                  |
| Oxymorphone HCl                | 3 (0.4%)                   | 1 (0.1%)                    | 0.002985075             | 0.00, 0.01            | 0.6                  | 0.9                  |
| Piroxicam                      | 0 (0%)                     | 2 (0.3%)                    | -0.002985075            | -0.01, 0.00           | 0.5                  | 0.8                  |
| Prednisolone                   | 1 (0.1%)                   | 0 (0%)                      | 0.001492537             | 0.00, 0.01            | >0.9                 | >0.9                 |
| Prednisolone Acetate           | 0 (0%)                     | 22 (3.3%)                   | -0.032835821            | -0.05, -0.02          | <0.001               | <0.001               |
| Prednisolone Sodium Phosphate  | 0 (0%)                     | 1 (0.1%)                    | -0.001492537            | -0.01, 0.00           | >0.9                 | >0.9                 |
| Prednisone                     | 46 (6.9%)                  | 167 (25%)                   | -0.180597015            | -0.22, -0.14          | <0.001               | <0.001               |
| Pregabalin                     | 182 (27%)                  | 39 (5.8%)                   | 0.213432836             | 0.17, 0.25            | <0.001               | <0.001               |
| Risedronate Sodium             | 0 (0%)                     | 2 (0.3%)                    | -0.002985075            | -0.01, 0.00           | 0.5                  | 0.8                  |
| Rofecoxib                      | 0 (0%)                     | 1 (0.1%)                    | -0.001492537            | -0.01, 0.00           | >0.9                 | >0.9                 |
| Sulindac                       | 3 (0.4%)                   | 2 (0.3%)                    | 0.001492537             | -0.01, 0.01           | >0.9                 | >0.9                 |
| Tapentadol HCl                 | 8 (1.2%)                   | 1 (0.1%)                    | 0.010447761             | 0.00, 0.02            | 0.045                | 0.12                 |
| Tetracycline HCl               | 0 (0%)                     | 1 (0.1%)                    | -0.001492537            | -0.01, 0.00           | >0.9                 | >0.9                 |
| Topiramate                     | 46 (6.9%)                  | 50 (7.5%)                   | -0.005970149            | -0.04, 0.02           | 0.8                  | >0.9                 |
| Tramadol-Acetaminophen         | 1 (0.1%)                   | 2 (0.3%)                    | -0.001492537            | -0.01, 0.01           | >0.9                 | >0.9                 |
| Tramadol HCl                   | 100 (15%)                  | 103 (15%)                   | -0.004477612            | -0.04, 0.04           | 0.9                  | >0.9                 |
| Valdecoxib                     | 0 (0%)                     | 2 (0.3%)                    | -0.002985075            | -0.01, 0.00           | 0.5                  | 0.8                  |
| Zoledronic Acid                | 0 (0%)                     | 2 (0.3%)                    | -0.002985075            | -0.01, 0.00           | 0.5                  | 0.8                  |

<sup>1</sup>n (%); <sup>2</sup>Two sample test for equality of proportions; <sup>3</sup>CI = Confidence Interval; <sup>4</sup>False discovery rate correction for multiple testing.

Figure S1: Visual representation of Table 2a

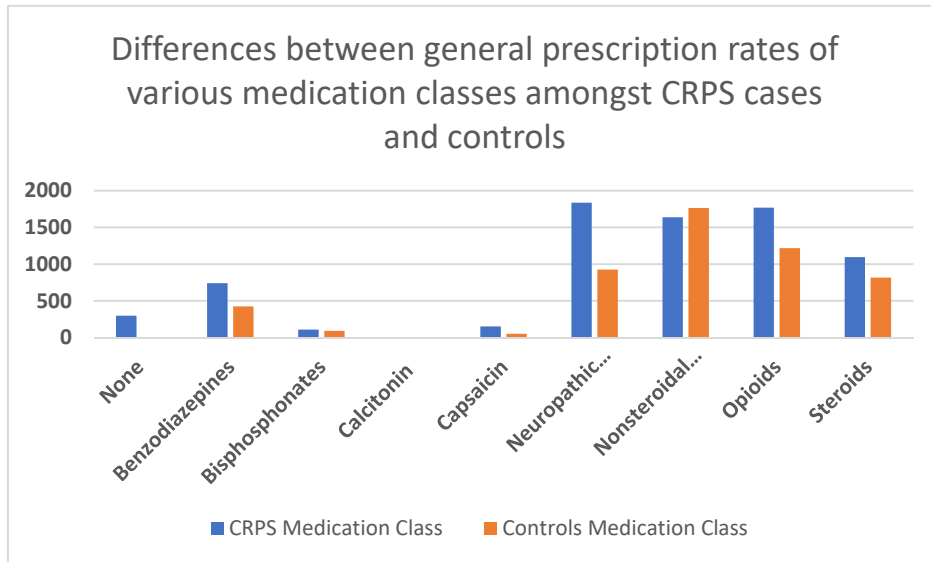

Figure S2. Visual representation of Table 2b.

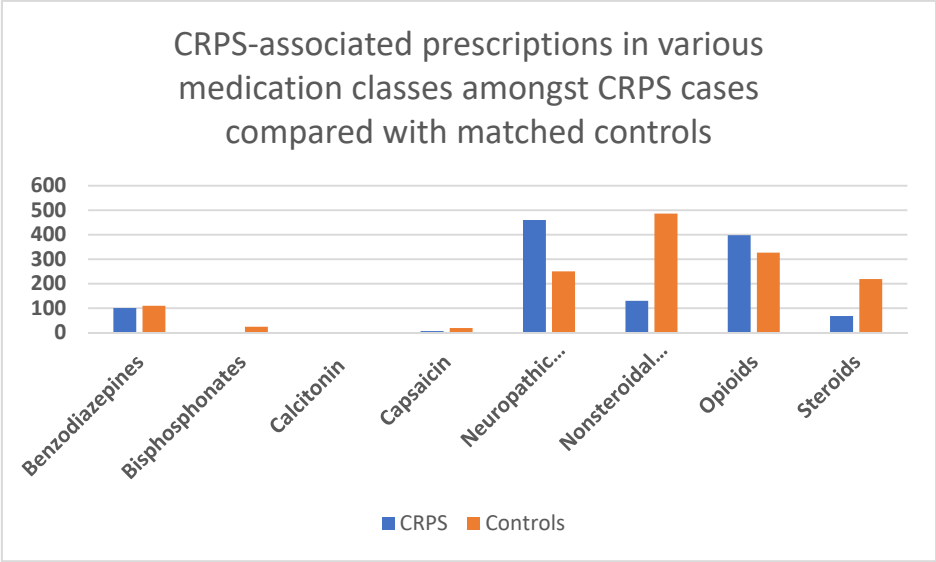

Supplement: s1 [file s1]
